# Supplementary material
Source: PubMed Central journal article supplement (PMC8756467)

## SUPPLEMENTAL MATERIAL

**Supplemental Table 1:** Comparison of those stroke patients eligible for analysis versus those excluded

|                                     | <b>Eligible<br/>(n=924)</b> | <b>Excluded<br/>(n=817)</b> | <b>P value</b> |
|-------------------------------------|-----------------------------|-----------------------------|----------------|
| <b>Age (years)</b>                  | 67.6±14                     | 65.3±14.8                   | 0.001          |
| <b>Sex, male</b>                    | 518 (56%)                   | 455 (56%)                   | 0.91           |
| <b>Race, nonwhite</b>               | 95 (11%)                    | 182 (23%)                   | < 0.0001       |
| <b>NIHSS, baseline</b>              | 7 (4-14)                    | 5 (2-10)                    | < 0.0001       |
| <b>tPA treatment</b>                | 614 (66%)                   | 469 (57%)                   | 0.001          |
| <b>Thrombectomy</b>                 | 133 (15%)                   | 30 (4%)                     | < 0.0001       |
| <b>Diabetes mellitus</b>            | 200 (22%)                   | 215 (26%)                   | 0.03           |
| <b>Glucose (mg/dl)</b>              | 121 (106-146)               | 119 (104-148)               | 0.15           |
| <b>Systolic BP (mm Hg)</b>          | 160±30                      | 160±30                      | 0.82           |
| <b>NIHSS, 24 hours</b>              | 5 (2-11)                    | 2 (1-6)                     | < 0.0001       |
| <b>Malignant edema</b>              | 55 (6%)                     | 6 (1%)                      | < 0.0001       |
| <b>TOAST stroke etiology</b>        |                             |                             | 0.003          |
| <b>Large artery atherosclerosis</b> | 146 (16%)                   | 117 (14%)                   |                |
| <b>Cardioembolism</b>               | 363 (39%)                   | 265 (32%)                   |                |
| <b>Small Vessel disease</b>         | 68 (7%)                     | 82 (10%)                    |                |
| <b>Other pathogenesis</b>           | 37 (4%)                     | 45 (6%)                     |                |
| <b>Undetermined</b>                 | 276 (34%)                   | 308 (38%)                   |                |

Categorical variables are presented as number (%). Values are presented as medians (interquartile range) if distributions are not normal and means (standard deviations) if normal.

Abbreviations: BP, blood pressure;

**Supplemental Figure 1:** Spaghetti Plots of individual patient trajectories for hemispheric CSF ratio, organized by cerebral edema (CED) grades. CED grade 0 are those with no visible edema on follow-up imaging, CED-1 have focal edema affecting less than one-third of the hemisphere, CED-2 have focal edema affecting more than one-third of the hemisphere, and CED-3 have hemispheric edema with midline shift.

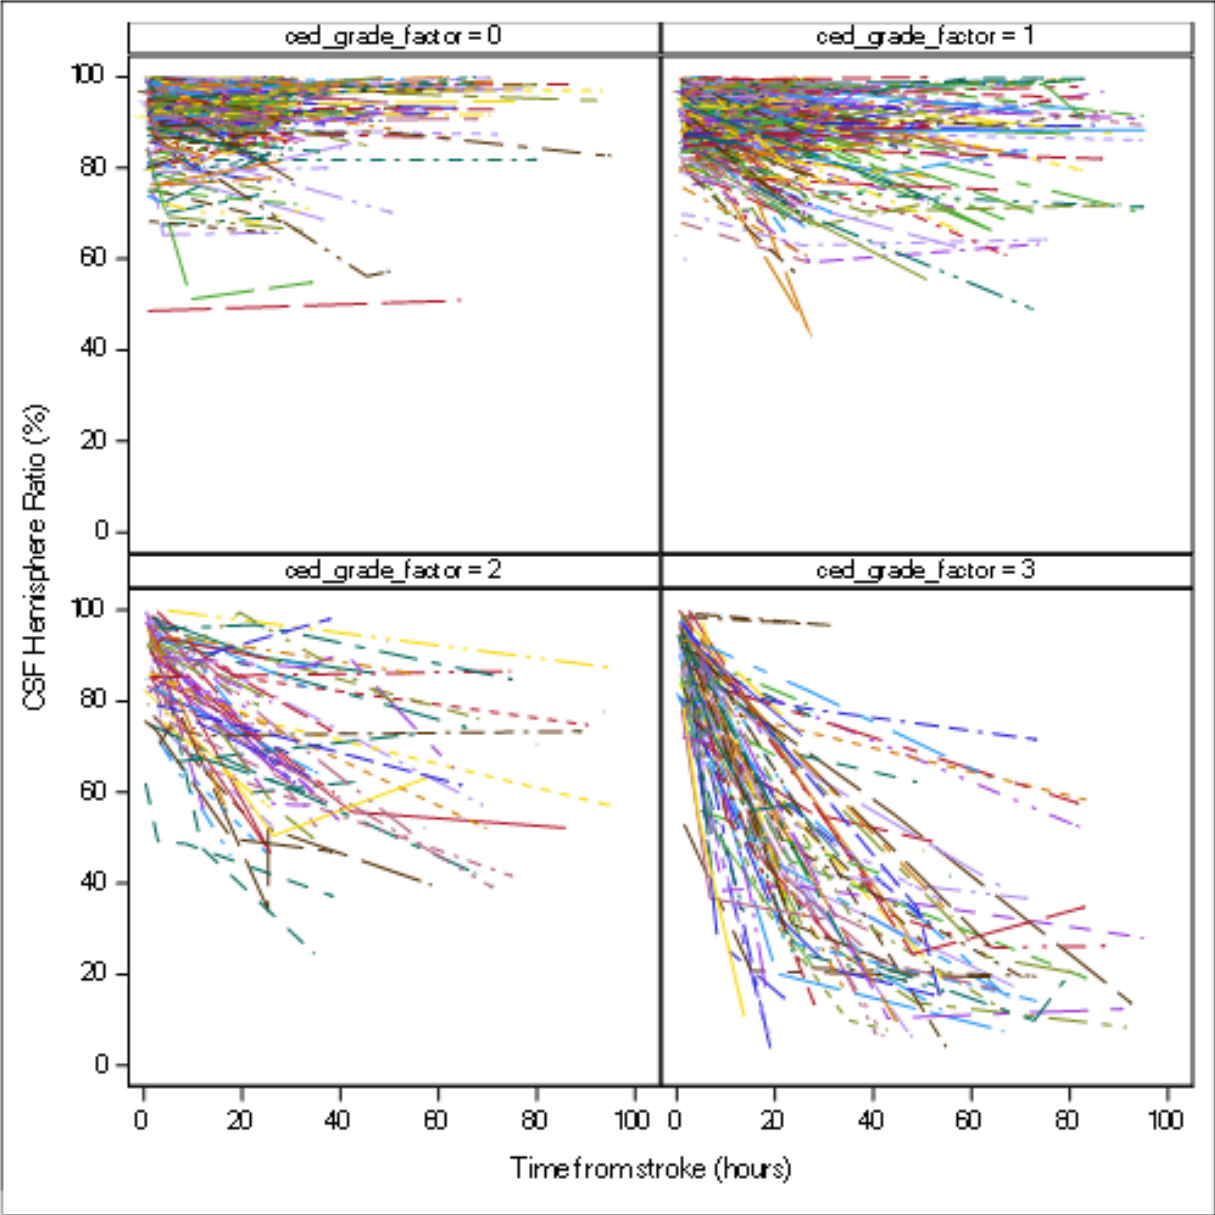

Supplement: sj-pdf-2-jcb-10.1177_0271678X211018210.pdf [file sj-pdf-2-jcb-10.1177_0271678X211018210.pdf]
